1

2

## Methods in field chronobiology

3

4 **Davide Dominoni<sup>1,2\*</sup>, Susanne Åkesson<sup>3</sup>, Raymond Klaassen<sup>4</sup>, Kamiel Spoelstra<sup>1</sup>,**

5

**Martin Bulla<sup>5,6,7</sup>**

6 <sup>1</sup> Department of Animal Ecology, Netherlands Institute of Ecology, P.O. Box 50, 6700 AB,

7 Wageningen, The Netherlands

8 <sup>2</sup> Institute of Biodiversity, Animal Health and Comparative Medicine, University of Glasgow,

9 Glasgow G128QQ, UK

10 <sup>3</sup> Centre for Animal Movement Research, Department of Biology, Lund University, Lund S-223

11 62, Sweden

12 <sup>4</sup> Groningen Institute for Evolutionary Life Sciences, University of Groningen, Groningen 9747

13 AG, The Netherlands

14 <sup>5</sup> Department of Behavioural Ecology and Evolutionary Genetics, Max Planck Institute for

15 Ornithology, Seewiesen 82319, Germany

16 <sup>6</sup> NIOZ Royal Netherlands Institute for Sea Research, Department of Coastal Systems, and

17 Utrecht University, P.O. Box 59, 1790 AB Den Burg, The Netherlands

18 <sup>7</sup> Faculty of Environmental Sciences, Czech University of Life Sciences Prague, Prague 16521,

19 Czech Republic

20 \*Author for correspondence ([d.dominoni@nioo.knaw.nl](mailto:d.dominoni@nioo.knaw.nl)).

21

22 **Keywords:** clocks, fibroblasts, remote sensing, GPS-tracking, incubation, radar

23

## 24 **Summary**

25 Chronobiological research has seen a continuous development of novel approaches and  
26 techniques to measure rhythmicity at different levels of biological organization from locomotor  
27 activity (e.g. migratory restlessness) to physiology (e.g. temperature and hormone rhythms, and  
28 relatively recently also in genes, proteins and metabolites). However, the methodological  
29 advancements in this field have been mostly and sometimes exclusively used only in indoor  
30 laboratory settings. In parallel, there has been an unprecedented and rapid improvement in our  
31 ability to track animals and their behaviour in the wild. However, while the spatial analysis of  
32 tracking data is widespread, its temporal aspect is largely unexplored. Here, we review the tools  
33 that are available or have potential to record rhythms in the wild animals with emphasis on  
34 currently overlooked approaches and monitoring systems. We then demonstrate, in three question-  
35 driven case studies, how the integration of traditional and newer approaches can help answer  
36 novel chronobiological questions in free-living animals. Finally, we highlight unresolved issues in  
37 field chronobiology that may benefit from technological development in the future. As most of the  
38 studies in the field are descriptive, the future challenge lies in applying the diverse technologies to  
39 experimental set-ups in the wild.

40

## 41 **Introduction**

42 For all organisms, exact timing of behaviour to both daily and seasonal environmental cycles is  
43 crucial for survival and successful reproduction [1,2]. Consequently, the study of biological  
44 rhythms, chronobiology, is a vibrant and interdisciplinary research area in biology [3–5].  
45 However, chronobiology has been largely dominated by studies of just a few model organisms  
46 under standardized laboratory conditions [4]. Bringing such studies into the wild has often  
47 generated surprising outcomes [6–8].

48 The knowledge gaps and discrepancies between laboratory and field studies were  
49 emphasized in a recent perspective article on the diversity of animal clocks in the wild: “...to  
50 *begin to understand the adaptive significance of the clock, we must expand our scope to study*  
51 *diverse animal species from different taxonomic groups, showing diverse activity patterns, in their*  
52 *natural environments*” [4]. Indeed, whereas controlled laboratory studies are essential to  
53 investigate the proximate mechanisms behind biological rhythms, they offer little insight about  
54 the diversity of temporal strategies that free-living animals may adopt and the fitness  
55 consequences of an eco-evolutionary process that takes place in the “real world”.

56 Building on this evidence, ecologists are increasingly using individual-based telemetry  
57 with high temporal and spatial resolution not only to study the movements of wild animals, but  
58 also to gain insights into the temporal patterns of their behaviour and physiology, as well as into  
59 the genetic, environmental and/or life-history factors that might affect the regulation of such  
60 rhythms [9,10]. For instance, recent telemetry work on arctic shorebirds has revealed unexpected  
61 inter- and intra-specific variation in their behavioural rhythms under the continuous daylight of  
62 arctic summer [10–12], and the combination of automatic radiotelemetry and EEG loggers  
63 demonstrated a link between activity and fitness in a polygynous shorebird [13]. Also, combining  
64 GPS-tracking, accelerometers and EEG loggers revealed unprecedented sleep-wake cycles of  
65 frigatebirds (*Fregata minor*) flying over the ocean for up to 10 days uninterruptedly [14]. The  
66 integration of ecological and chronobiological approaches and techniques can therefore help not  
67 only answering old questions traditionally confined to laboratory settings, but also ask novel  
68 exciting questions that are more pertinent to field systems (Table 1). Such integration can also  
69 improve our understanding about how adaptive biological rhythms are in the wild, for instance  
70 through a combination of genetic engineering and animal tracking [15].

71 This paper has two major aims. First, we review traditional and relatively recent tools to  
72 collect chronobiological data in the wild. In particular, we emphasize the suitability of ecological  
73 tools initially developed for other purposes (e.g. to map migration patterns of animals) and the  
74 added value of integrating different technologies. Second, we present three case studies to  
75 demonstrate how such tools and their integration can be used to answer some of the questions in  
76 the field chronobiology (Table 1). We pick each case study for a specific reason. The first case  
77 study uses array of technologies to reveal the diversity and drivers of behavioural rhythms in the  
78 wild, as well as to discuss how the findings compare to the findings from captive conditions  
79 (Table 1, questions 1-3). Most of the technologies in this case study were traditionally deployed  
80 for other purposes than measuring behavioural rhythms. In the second case study we initially  
81 review technologies that allow individual-based and group-based tracking of insects, for which we  
82 have yet to fully appreciate how their rhythms are expressed in the wild. We then demonstrate the  
83 use of laser radar to record activity rhythms of insect groups across time and habitats (Table 1,  
84 question 1). The third case study combines tracking methods and genetic engineering to tackle  
85 one of the most pressing chronobiological questions, that is, whether clocks are adaptive (Table 1,  
86 question 5).

87

88

## 89 **Integrating old and new approaches to record rhythms in the field**

90 Chronobiologists assess rhythmicity in captive animals by measuring activity rhythms (e.g.,  
91 locomotion and foraging), physiological rhythms (e.g., body temperature or melatonin  
92 production), and molecular rhythms (e.g., gene expression) [3,16,17]. Activity rhythms are  
93 quantified using infrared sensors or mechanical instruments such as the running wheel [18].  
94 Physiological rhythms are usually assessed using temperature and heart rate loggers [19], or  
95 sampling of blood, urine and faeces which are subsequently analysed for hormone concentration  
96 (melatonin, testosterone, etc.) [20]. Molecular rhythms are assessed by gene expression - a  
97 relatively recent tool - performed with diverse methods ranging from microarrays to quantitative  
98 PCRs [17] and transcriptomics [21], or by quantification a wide range of proteins and metabolites  
99 [21]. All these methodologies can be used, and some of them already are used, to also elucidate  
100 rhythms of organisms in the wild. For instance, a recent study used running wheels with free-  
101 living mice in the wild [18] and found similar temporal patterns of running as in captive mice. In  
102 addition, there have been great developments in individual-based tracking technologies as well as  
103 in automated monitoring systems, which allows gaining unprecedented insight into behavioural  
104 and physiological rhythms of free-living animals. Thus, chronobiologists have now a well-  
105 equipped toolbox at hand to study rhythms of organisms in the wild.

106 We summarise the methods available to field chronobiology in Table 2 and 3. We  
107 distinguish methods used to record behavioural and physiological rhythms (Table 2), which often  
108 involve tagging animals, from relatively new methodologies that assess molecular rhythms or use  
109 genetic engineering to manipulate circadian time (Table 3). We briefly describe how each method  
110 works, what kind of rhythmic information it can measure, and provide examples of  
111 chronobiological questions it can help answer. Although we have described each method  
112 separately, field chronobiology may strongly benefit from integrating existing methodologies. For  
113 instance, geolocators and accelerometers can be jointly deployed on the same animal to infer daily  
114 activity patterns of birds at different stages of their migration journey [22,23]. and a combination  
115 of accelerometers, automated radio-telemetry and EEG recordings revealed strikingly variability  
116 in timing of sleep in tree-toed sloths (*Bradypus variegatus*) [24]. In addition, different  
117 technologies can be integrated within a single tag. For example, daily diaries have multiple built-  
118 in sensors that simultaneously record behavioural, physiological and environmental rhythms [25],  
119 thereby allowing a holistic view into biological rhythms of wild animals.

120

## 121 **CASE STUDY 1: Diversity of individual rhythms in the wild - avian incubation** 122 **and foraging behaviour**

123 **Key questions:** How variable are rhythms within and between wild populations? What drives such  
124 variation? Are rhythms of captive animals comparable to rhythms of animals in the wild?

125  
126 We understand little about within- and between-species diversity of behavioural rhythms in the  
127 wild (see Editorial of this issue and [4]). Consequently, we also understand little about what  
128 drives the potential variation in these rhythms, e.g. to what extent rhythms are determined by  
129 evolutionary history and/or by plastic responses to the environment.

130 Here, we demonstrate how diverse monitoring methods can be used to fill this knowledge  
131 gap, that is, to study variation in behavioural rhythms (daily and seasonal) in free-living non-  
132 model organisms in their natural environments and in unexplored contexts. Specifically, we  
133 discuss monitoring methods used to reveal the diversity in incubation rhythms of biparental  
134 shorebirds [11] and demonstrate the use of GPS-tracking to derive novel data on diverse foraging  
135 activity patterns of raptors (Klaassen *et al.*, in preparation).

### 136 137 **Incubation rhythms of biparental shorebirds.**

138 It is often unclear how findings on single individuals translate to the social context typically  
139 experienced by organisms in their natural environment, i.e. when it matters to them [4]. For  
140 example, when individuals pursue a common goal such as reproducing, the social environment is  
141 expected to shape their behavioural rhythms [26]. However, social synchronization and its  
142 outcome in terms of behavioural rhythms are poorly understood.

143 Avian biparental incubation is a mutually exclusive, but socially synchronized,  
144 behavioural rhythm. A recent study [11] used an array of monitoring methods (RFIDs, light  
145 loggers, GPS-based systems, radio-tags, video recordings and continuous observations; Table 4)  
146 to reveal unprecedented within- and between- species diversity in incubation rhythms across 729  
147 nests of 91 populations of 32 biparentally-incubating shorebird species (Fig. 1).

148 Multiple sampling methods allowed us to include more species and populations, as well as  
149 to increase sample size for some populations. Although the sampling interval varied from  
150 continuous to 30 min sampling between methods (Table 3) and populations, as well as within  
151 some populations, the incubation variables were independent of sampling interval (Table 2 in the  
152 Extended Data of [11]).

153 Incubation records were transformed to local time (UTC time+(nest's longitude/15)) to  
154 make them comparable across sites. For each nest, the authors manually or automatically  
155 [11,12,27,28] extracted lengths of all available incubation bouts defined as the total time allocated  
156 to a single parent (i.e. the time between the arrival of a parent at and its departure from the nest  
157 followed by incubation of its partner). Bout lengths were then used to extract the length of the  
158 period (the most prominent cycle of female and male incubation) that dominated each incubation  
159 rhythm. Finally, phylogenetically informed comparative analyses were used to investigate  
160 phylogenetic signal in bout and period length, the relationship between bout length and body size,  
161 latitude and escape distance from the nest, as well as relationship between period and latitude.

162 The study found substantial within- and between-species variation in incubation rhythms  
163 (Fig. 1). For example, between species, the period length of the incubation rhythms varied from  
164 six to 43 hours. Different species, but also different pairs of the same species, adopted strikingly  
165 different incubation rhythms, even when breeding in the same area. For example, the incubation  
166 period length for Long-billed dowitchers *Limnodromus scolopaceus* varied from 21.75 to 48  
167 hours. Interestingly, 24-h incubation rhythms were absent in 78% of nests representing 18 out 32  
168 species.

169 Importantly, the study explained part of the described variation in the incubation rhythms.  
170 For example, there was a strong phylogenetic signal (Pagel's  $\lambda$  was close to 1). In addition, the  
171 incubation rhythms with periods that do not follow the 24-h light-dark cycle were more common  
172 and the deviations from 24-h increased in shorebirds breeding at high latitudes. This supports the  
173 existence of a latitudinal cline in incubation rhythms, but a substantial number of rhythms defied  
174 the 24-h day even at low and mid latitudes. These results indicate that under natural conditions  
175 social synchronization can generate far more diverse behavioural rhythms than previously  
176 expected (e.g. from studies of captive animals), and that the incubation rhythms often defy the  
177 assumptions of entrainment to the 24-h day-night cycle.

178

### 179 **Diel activity patterns of diurnal raptors**

180 Individual variation in daily and seasonal foraging rhythms remains poorly understood. This is  
181 perhaps not surprising as, until recently, long term monitoring of many individuals was not  
182 feasible (e.g. it was too labour intensive, but see an example on hunting activity of individual  
183 European Kestrels *Falco tinnunculus* recorded with visual observations [29]). This issue is now  
184 solved by the availability of several types of tracking devices that allow us to follow the behaviour  
185 and movements of individual animals in unprecedented spatiotemporal detail (Table 2). However,

186 most analyses of tracking data focus on spatial aspects such as home range size and migration  
187 routes, whereas temporal aspects such as daily and seasonal activity patterns are largely  
188 overlooked (but see e.g. [30–33]). This suggests that the huge amount of detailed tracking data that  
189 is currently routinely collected is generally underused for chronobiological purposes. Here we  
190 provide an example of how GPS-tracking data could be used to infer daily foraging rhythms of  
191 individual Montagu's Harriers *Circus pygargus*.

192 We re-analysed GPS tracking data of three individual Montagu's Harriers, which were  
193 originally collected to study home range behaviour and habitat use during the breeding season  
194 (Klaassen *et al.* in preparation). The birds were tracked by UvA-BiTS GPS-loggers [34] that were  
195 programmed to sample the position and speed of the bird every 5 to 30 minutes during the day and  
196 every hour to two hours during the night (note that one of the advances of this tracking system is  
197 that tags can be programmed remotely when in reach of a local antennae, [34]). Flying behaviour  
198 was defined when the instantaneous GPS-speed exceeded 2 m/s, as the intercept of the probability  
199 density functions of speeds during sitting and during flight, which together make up the bi-modal  
200 density distribution of instantaneous speeds (Klaassen *et al.*, in preparation). To reconstruct daily  
201 activity patterns, the proportion of flight instances within each hour of the day was calculated,  
202 lumping data across all available days (7-14 days, see Fig. 2). The average time flying per day  
203 was obtained by the sum of the hourly flight proportions. In this analysis, only daylight hours  
204 were included as loggers only collected sufficient data during daylight hours (fix interval 5-30  
205 minutes) and because harriers are strictly diurnal. Montagu's Harriers hunt on the wing by slowly  
206 flying above foraging habitat, thus flight will mainly represent foraging activity. As Montagu's  
207 Harriers are long-distance migrants, daily activity patterns could be compared across different  
208 ecological contexts, i.e. the breeding site in Europe, their main migratory stopover site in  
209 Northwest Africa, and the wintering site in the Sahel in Africa [35].

210 Within individuals, daily activity patterns differed between the breeding, stopover and  
211 wintering site. Harriers flew more at breeding sites (mean values for the three individuals were  
212 6.4, 7.5 and 7.7 hours per day, based on N = 183 days) than at stopover (3.4, 3.7 & 4.7 hours per  
213 day, N = 42 days) or wintering sites (4.1, 4.2 & 4.4 hours per day, N = 214 days) (Fig. 2). Not  
214 only had the amount of time spent flying per day varied between sites, but also temporal patterns  
215 of daily activity. For example, at wintering sites, harriers have a distinct dip in activity around  
216 noon. This “Siesta” is much less pronounced for stopover sites and almost absent for breeding  
217 sites (Fig. 2). Activity patterns also differed between individuals, with for example “Joey” flying

218 less (6.5 hours per day) during the breeding season compared to “Elzo” (7.7) and “Yde” (7.5)  
219 (Fig. 2).

220 In order to quantify the degree of similarity in daily activity patterns, for example between  
221 individuals or between sites, the overlap index was calculated:

$$\frac{2 \sum_i a_i b_i}{\sum_i a_i^2 + \sum_i b_i^2}$$

222 where a and b are the proportions of time flying for the two activity patterns that are compared,  
223 for different hours (i). This index ranges from 0 for non-overlapping distributions to 1 for  
224 identical distributions [36]. The overlap index between sites (average [range] index for each  
225 individual: red = 0.81 [0.77-0.87], blue = 0.90 [0.85-0.95] and yellow = 0.75 [0.73-0.79]) was  
226 relatively low compared to the overlap index between individuals at a given site (average index  
227 [range]: breeding = 0.97 [0.96-0.99], stopover = 0.94 [0.93-0.95] and wintering = 0.93 [0.88-  
228 0.96]). Thus, in this particular example, activity patterns tended to be similar across individuals at  
229 a given site, but varied to a greater degree across sites (Fig. 2), possibly suggesting a prominent  
230 role of environmental drivers shaping activity patterns in wild Montagu’s Harriers. Seasonal  
231 differences in daily activity patterns could, for instance, arise from different feeding habits of  
232 Montagu's Harriers in the three different seasons: voles and the need to feed young during the  
233 breeding season [37], eggs and nestlings of passerines during the main spring stopover in NW  
234 Africa [38], and grasshoppers in winter [39]. Whether between-individual variation in activity  
235 patterns reflects differences in individual personalities, with some birds being more explorative  
236 than others (e.g. [40]) or differences in habitat quality, is unclear. The speculations about how this  
237 within- and between individual variation arise deserve future testing and can only be resolved by  
238 combining the tracking results with field observations of the ecological circumstances at the three  
239 sites, such as how prey abundance and harriers' hunting success vary throughout the day [38].

240

## 241 **Conclusion**

242 We demonstrated how incubation and foraging rhythms of free-living birds vary within- and  
243 between individuals and species, across seasons, latitudes, and depending on phylogeny (i.e.  
244 provide answers to question 1-2 in Table 1), and that such rhythms are more diverse than expected  
245 from studies in captivity (question 3 in Table 1).

246 These finding generate three main questions: (1) Are other behavioural rhythms in the  
247 wild also that diverse? (2) Are these rhythms regulated by endogenous (clock-driven) or  
248 environmental factors, or by a mixture of these? (3) What are the fitness consequences of various



249 behavioural rhythms? To address these questions, we need to (1) expand our studies to different  
250 species and ecological contexts (e.g. monitoring of rhythms in both predators and preys), (2) use  
251 molecular tools that allow quantification of endogenous clocks in the wild (e.g. fibroblast assays,  
252 see Table 3 and [41,42]), and (3) monitor behavioural rhythms over the long-term to understand if  
253 and how individual variation in rhythms is linked to fitness (see case study 3).

254

## 255 **CASE STUDY 2: From individual to population rhythms: Timing of insects'** 256 **movement in the field**

257 *Key questions:* How variable is timing of activity between insect groups? What environmental  
258 factors are related to such variation?

259

260 Insects are key laboratory models in chronobiology [43,44]. Yet, long term biotracking of insects  
261 in the wild, unlike tracking of vertebrates [45], is rare and limited to the largest species [46]. This  
262 is alarming because the limited evidence from semi-natural conditions revealed temporal  
263 components of behaviour that markedly differ from those recorded in the laboratory [8]. Here we  
264 briefly review the tracking of individual insects, as well as of groups (for description of each  
265 method). Then we illustrate recent applications of laser radar to identify groups of insects and  
266 their daily activity rhythms over various habitats.

267

### 268 **Tracking individual insects**

269 Monitoring of individual insects in the wild can be done by active (battery-powered) radio  
270 transmitters or by harmonic radar and RFID which use passive tags (without battery) [46]. Radio-  
271 telemetry is limited by the available tags, most of which are too large, too heavy (2-100% of body  
272 mass), have limited tracking range on the ground (100–500 m), and/or have short battery life (7-  
273 21 days) [46]. Hence, radio-telemetry has been mainly used with larger insects (beetles and  
274 crickets), and only relatively recently with bees, dobsonflies and dragonflies. Such studies are  
275 mainly local in scale, but ground crews and receivers mounted on an airplane allowed monitoring  
276 of dragonfly migration over 150 km and up to 12 days [47].

277 In contrast to radio-transmitters, the tags used with harmonic radar and RFID have lower  
278 weight and hence can be used with a broader range of insect taxa [46]. Although the individuals  
279 can be monitored over a longer period of time than with radio-transmitters, the monitoring is only  
280 local as the detection zone of a stationary radar unit is < 1 km in diameter and the detection

281 distance of RFID tags is usually < 1–5 m. Thus, RFID is useful for insects returning on a regular  
282 basis to their burrows (e.g. crickets) or hives (e.g. bees and bumblebees) [46,48].

283 Although miniaturization of tags will certainly extend the range of trackable insect taxa,  
284 some miniature insects are trackable only in groups, for instance with help of citizen science [49]  
285 or various radar technologies [50–52] (see Table 2 and next section).

286

### 287 **Tracking groups of insects**

288 Vertical-looking radars, harmonic radars and weather radars have all been deployed to track flying  
289 insects since 1970s [50–52]. Vertical-looking radars detect insects that pass through the radar  
290 beam pointing up into the sky. Harmonic radars detect movements across a horizontal transect at a  
291 ground level, while the beam of weather radars spreads out as it moves away from the station,  
292 covering an increasingly larger volume (up to several km<sup>3</sup>). Thus, these radars are useful to infer  
293 timing of migration, flight altitudes (up to 1km) and orientation of the insects in relation to winds  
294 [53]. However, information about movements is generally limited to a single location of  
295 observation [54]. Moreover, this technology is suitable predominantly for large insects, and  
296 insects can only be classified by size and air speeds. In sum, these radar technologies are usually  
297 unable to distinguish species from one another. However, to understand activity rhythms in free-  
298 ranging insects, especially of those that are too small for any individual-based tracking  
299 technology, identifying insects remotely to groups, families, or better to species, is necessary.

300 Classification of insects to groups may be possible with laser radar (lidar; for details see  
301 below and [55]). The lidar beam that spreads out as it moves away from the station, covers a  
302 probe volume of approximately 10 m<sup>3</sup> over a 2 km range. Lidars can detect groups of insect by  
303 measuring the spectrum of the light reflected by the body and wings of the flying insect as it flies  
304 across the laser beam [55,56]. That is, lidar can classify groups of insects according to wing beat  
305 frequency, body size, wing area, and potentially also body surface structures.

306 Classification of larger insects (such as damselflies) to species and to sex (if sexes are  
307 colour dimorphic) is also possible. Individuals previously marked with fluorescence dye generate  
308 a colour specific peak in the lidar signal [57]. Alternatively, dark-field spectroscopy identifies  
309 flying insects by registering sunlight reflected from the insect surface, when the insect passes  
310 across sampling area (∅ 20-30 cm, up to 300 m afar) monitored by the spectroscope [58]. The  
311 distance to the insect is measured as well as its size and direction of flight, thereby including also  
312 spatial components of activity patterns.

313

## 314 **Use of laser radar to identify rhythms in groups of flying insects**

315 Here, we illustrate the use of lidar technology to record temporal and spatial variation in flying  
316 insect abundance according to insect groups and habitat structures [59]. In this study, the lidar  
317 beam was sent 1.8 m above an open meadow and terminated at a distance of 140 m by a box made  
318 out of a dark cardboard, in an area where the meadow was surrounded by a forest edge.

319 Over the course of two nights, three main insect clusters were identified in the data (Fig  
320 3a). Some insect groups had a wider peak of activity and were more evenly distributed over the  
321 140 m transect (Fig 3b, Cluster a-b) than others (Fig 3b, Cluster c). Specifically, one insect cluster  
322 was especially abundant at the beginning of the night (Fig. 3b, Cluster c), especially in a meadow  
323 surrounded by a forest edge. Such temporal structuring across habitats might be typical for  
324 insects. For example, abundance of flying insects is higher over the grazed meadow compared to  
325 crop fields with oats [60].

326 These findings elucidate how various insect groups cluster in time and space and suggest  
327 variability in daily timing across different groups of insects and across various habitats. However,  
328 the study has two major limitations. First, the study lasted only for three days, but recordings over  
329 several days, preferably months, are necessary to identify activity rhythms and their variation over  
330 time. This is essential, if we aim to elucidate the role of different environmental variables in  
331 driving variation in such rhythms. Second, the body-wing proportions overlapped between species  
332 and insects were thus classified only to groups based on body-wing proportions and wing-beat  
333 frequencies (Fig. 3a). However, deeper understanding of insect behavioural rhythms requires  
334 classification of insects down to the order, family or better species level. Such classification might  
335 be feasible if the species classification algorithm includes additional variables [60], or when it is  
336 calibrated by releasing insects of known species that are then recorded by the lidar.

337

## 338 **Conclusion**

339 Here we briefly reviewed the technology and limitations to track insects, both individually and in  
340 groups. Then we demonstrated how lidar may reveal temporal and spatial variation in activity of  
341 various flying insect-groups [59,60]. Hence, the study provides preliminary insights about how  
342 insect rhythms vary between groups (Table 1, question 1) and across habitat types (Table 1,  
343 question 2). We further highlight current limitations in classifying insects to lower taxonomic  
344 levels. Once such limitations are tackled, lidar will help us answer question related to the  
345 variability and drivers of rhythms in different insect taxa, and how these differ between laboratory  
346 and wild populations (Table 1, question 3).

347 Lidar technology might also prove suitable for future investigations of nocturnal bird  
348 migration. Species could be classified based on flight speed, but also based on plumage  
349 characteristics, including coloration [57,61]. Such information is of interest to comparative studies  
350 investigating seasonal and diurnal variation in migration patterns. In addition, although lidar has  
351 been so far applied mainly in pilot studies over short time period, using this technology over  
352 longer periods will improve our understanding about daily rhythms of insect abundance across  
353 seasonal and environmental contexts.

354

### 355 **CASE STUDY 3: Measuring fitness consequences of circadian organization in** 356 **the wild**

357 **Key question:** Can we link the variation in circadian organization of activity to fitness in the wild?

358

359 Accurate timing of daily activity of organisms has long been assumed essential for fitness and  
360 survival, for example for the anticipatory regulation of physiology and behaviour in advance of  
361 changes in environmental conditions [62,63]. In captive animals, positive effects of a near 24 h  
362 endogenous circadian period with a duration comparable to the external (laboratory controlled)  
363 light-dark cycle are reported for the growth rate and longevity of insects [44,64], as well as for the  
364 lifespan of mice [65] and hamsters [66]. However, the laboratory is not the environment in which  
365 species have evolved and circadian traits have been selected. It is therefore essential to study the  
366 adaptive value of circadian function under natural conditions [67,68].

367 To demonstrate adaptiveness of circadian organization in natural habitats is however  
368 daunting. First, the powerful natural light/dark cycle limits experimental manipulation of temporal  
369 behaviour. Second, free-ranging individuals have to be followed throughout their life and their  
370 reproductive success needs to be measured. DeCoursey et al. [69,70] studied fitness consequences  
371 of lesions of the Suprachiasmatic Nucleus (SCN), the master circadian pacemaker in mammals, in  
372 antelope squirrels (*Ammospermophilus leucurus*) and chipmunks (*Tamias striatus*). SCN lesions  
373 are used in chronobiology experiments to abolish circadian rhythms in sleep-wake cycles and  
374 activity in mammals [71,72]. The survival of antelope squirrels and chipmunks was monitored  
375 with the use of transponders (RFID's, see Table 2) and radio telemetry, respectively. In these  
376 studies, the SCN lesions compromised longevity: individuals with lesions lived shorter than sham  
377 control animals. These results provided the first evidence of the adaptive value of circadian  
378 organization in free-ranging mammals. However, to rigorously test for fitness consequences, it is

379 essential to measure whether circadian rhythms not only affect survival, but also reproductive  
380 success [67].

381 A way to measure both individual and reproductive fitness is to use heritable circadian  
382 traits (e.g. the level of rhythmicity or the length of internal clock's circadian period) in a selection  
383 experiment. Such traits have become available in an increasing number of organisms in the form  
384 of natural or engineered circadian mutants. Selection experiments have been done in the  
385 laboratory with strains of cyanobacteria carrying mutations that effected their circadian period.  
386 Strains with a circadian period similar to the applied external light-dark cycle outcompeted strains  
387 with a different circadian period; thus, showing selective advantage for an endogenous circadian  
388 period that matches the external light/dark cycle [73,74].

389 Here, we highlight the methods to translate selection experiments into semi-natural  
390 conditions using results from two competition experiments with mice [15,75]. The experiments  
391 integrated existing monitoring methods with present-day availability of circadian mutants. Wild-  
392 type mice (without the mutation) and mutant mice (homo- and hetero-zygote for a circadian  
393 mutation) were housed in mixed populations in outdoor enclosures. All mice were produced from  
394 heterozygote parents. Mice presence and longevity was monitored by subcutaneous RFID tags  
395 recorded at feeding stations. This allowed permanent monitoring of each individual and hence the  
396 mutant allele frequency in each population.

397 The first study [75] used mice with a mutation in the period2 gene (*mPer2<sup>brdm1</sup>*), which  
398 weakens circadian rhythmicity and causes health problems in the laboratory [76]. The mutant and  
399 wild type mice were released into four outdoor enclosures in near Mendelian ratio (homozygote :  
400 heterozygote : wild type = 1 : 2 : 1). However, there was no selection against the mutant allele  
401 over the course of two consecutive years [75].

402 The second study [15] used a comparable setup as the first one, but with six outdoor  
403 enclosures and the mutant tau allele (*Ckl1<sup>tau</sup>*) which shortens the endogenous circadian period  
404 [77]. At the start of the experiment this mutation was present in near Mendelian ratio. Here, a  
405 strong selective force against the mutant allele reduced its frequency from approximately 0.5 to  
406 almost 0.2 in little over a year (Fig. 4). Even though unknown non-circadian pleiotropic effects by  
407 the mutation cannot fully be excluded, this finding strongly indicates fitness consequences of  
408 aberrant circadian organization.

409 These results suggest that fitness consequences of behavioural rhythms with a circadian  
410 period length that deviates from the light/dark cycle in a semi-natural setting (second study) may  
411 be more severe compared to the consequences of a weaker circadian rhythm (first study). This is

412 in line with the profound impact of strong deviations in circadian period reported from the lab  
413 [65,66]. However, more studies on the impact of variation of circadian rhythmicity on fitness in  
414 the field are needed.

415

## 416 **Conclusion**

417 So, can we link circadian organization to fitness in the wild? In the second experiment, the  
418 ultimate control test would be to shorten the duration of the period of the natural light/dark cycle.  
419 However, a true manipulation of the natural light/dark cycle is hard to achieve in the field, and  
420 this remains a major limitation for experimental studies on fitness consequences of circadian  
421 timing in wild animals. Nevertheless, developing novel, long lasting and smaller tracking systems  
422 will expand the possibilities to study natural variation of circadian organization in free-ranging  
423 species. These will enable us to follow more and smaller species for a longer time in the field.  
424 Indeed, in some contexts (e.g. bees, fish in small ponds, birds), life-long tracking of individuals  
425 (e.g. using RFID and satellite tracking; see Case study 1 [38]) is already possible. Information on  
426 individual variation in circadian organization, in combination with data on longevity will provide  
427 new insights on the evolutionary consequences of daily rhythms in free-ranging animals (Table 1,  
428 question 5).

429 The circadian phenotype of the tracked individuals can be precisely estimated by standard  
430 behavioural assays in the laboratory, but also with the use of skin fibroblasts (see Table 3 and  
431 [78]). In addition, other manipulations of the natural light/dark cycle (e.g. use of artificial light at  
432 night in natural habitat) are possible [79] and have been shown to affect circadian as well as  
433 seasonal traits in a variety of species [80–82]. However, the fitness consequences of such effects  
434 are still unclear. A recent correlative study has linked light at night to variation in dawn song and  
435 reproductive success (extra-pair paternity) in a wild songbird [83], but an experimental  
436 manipulation of light at night in the field has shown little effect on the reproductive success in a  
437 closely related species [79].

438

## 439 **Outlook**

440 Methods to monitor behavioural, physiological and molecular rhythms develop rapidly, but are  
441 not used to their full potential for tracking biologically relevant rhythms in free-ranging animals in  
442 their natural environments. Here we have briefly reviewed established and unconventional  
443 methods available for tracking animal rhythms in the wild and suggest possible future applications  
444 (Table 2 and 3). With the help of three case studies, we further illustrated how to use some of the

445 reviewed technologies to reveal: a) the variability in behavioural rhythms at different taxonomic  
446 level, from individuals to species (Case study 1 and 2, Figure 1, 2, 3), (b) the phylogenetic and  
447 environmental factors that may influence such variability (Case study 1), and (c) the fitness  
448 consequences of functional clocks (Case study 3, Figure 4). These case studies serve as examples  
449 of what is currently possible to achieve, but the opportunities do not end here. For instance,  
450 whereas detailed tracking data are currently limited to larger animals [45], miniaturization of tags  
451 may allow individual tracking of very small animals such as insects [46].

452 Technological advances not only result in smaller devices, but also ‘smarter’ devices that  
453 integrate different sensors. For example, tags that contain accelerometers, as well as physiological  
454 and environmental sensors, enable a detailed view into the timing of various animal behaviours  
455 and the relation of such timing to habitat characteristics [25,32]. However, one of the challenges is  
456 to develop standard methods to extract daily activity patterns from tracking data in order to  
457 facilitate intra- and inter-specific comparisons. For example, it is yet unclear how to integrate  
458 datasets that differ in resolution (e.g. time interval between fixes, accuracy of location data; but  
459 see [11]) or that use different sources of auxiliary data (e.g. accelerometer data compared to  
460 instantaneous speed data).

461 The current rise of field studies is mostly confined to descriptive work. Combining various  
462 technologies to record rhythms in the wild with rigorous experimental designs will enhance the  
463 mechanistic understanding of how rhythms of free-living animals are regulated, including the  
464 relative contribution of endogenous versus environmental factors, as well as the adaptive function  
465 of biological clocks.

466

## 467 **Ethics**

468 Research using animals shown in the case studies adhered to local guidelines and appropriate  
469 ethical approval and licenses were obtained.

470

## 471 **Data, code and materials**

472 Supporting information, data and R-codes to reproduce Figure 1 and the incubation results of the  
473 1<sup>st</sup> case study are freely available from Open Science Framework: <https://osf.io/wxufm/>. Data used  
474 to produce Figure 2 will be uploaded in Dryad if the manuscript will be accepted.

475

## 476 **Competing interests**

477 We have no competing interests.

478

## 479 **Authors' contribution**

480 D.M.D., M.B., K.S., S.A. conceived the paper. M.B. drafted the 1st case study, R.K. its foraging  
481 part. S.A. drafted the 2<sup>nd</sup> case study. K.S. drafted the 3<sup>rd</sup> case study. D.M.D. coordinated the  
482 writing and with help from all other authors drafted the introduction, methods review and outlook.  
483 All authors finalized the paper and D.M.D. with M.B. addressed referees' comments.

484

## 485 **Acknowledgments**

486 We thank the co-editor of this special issue Bill Schwarz for guidance during designing and  
487 drafting the manuscript, and all that made the data collection and analyses, and this paper  
488 possible.

489

## 490 **Funding**

491 D.M.D is funded through an Open Competition Grant from the Dutch Science Foundation  
492 (NWO). M.B. is funded by the Max Planck Society (to Bart Kempenaers) and the EU Marie Curie  
493 individual fellowship, and was a PhD student in the International Max Planck Research School for  
494 Organismal Biology.

495

## 496 **References**

- 497 1. Emerson, K. J., Bradshaw, W. E. & Holzapfel, C. M. 2008 Concordance of the Circadian  
498 Clock With the Environment Is Necessary To Maximize Fitness in Natural Populations.  
499 *Evolution (N. Y.)*. **62**, 979–983. (doi:10.1111/j.1558-5646.2008.00324.x)
- 500 2. Yerushalmi, S. & Green, R. M. 2009 Evidence for the adaptive significance of circadian  
501 rhythms. *Ecol. Lett.* **12**, 970–981. (doi:10.1111/j.1461-0248.2009.01343.x)
- 502 3. Aschoff, J. 1985 Circadian timing. *Ann. N. Y. Acad. Sci.* **423**, 442–467.
- 503 4. Kronfeld-Schor, N., Bloch, G. & Schwartz, W. J. 2013 Animal clocks: when science meets  
504 nature. *Proc. R. Soc. B* **280**, 20131354. (doi:10.1098/rspb.2013.1354)
- 505 5. Helm, B., Ben-Shlomo, R., Sheriff, M. J., Hut, R. A., Foster, R., Barnes, B. M. &  
506 Dominoni, D. M. 2013 Annual rhythms that underlie phenology: biological time-keeping  
507 meets environmental change. *Proc. R. Soc. London B Biol. Sci.* **280**, 20130016.  
508 (doi:10.1098/rspb.2013.0016)
- 509 6. Daan, S. 2011 How and Why? The lab versus the field. *Sleep Biol. Rhythms* **9**, 1–2.  
510 (doi:10.1111/j.1479-8425.2010.00482.x)



- 511 7. Calisi, R. M. & Bentley, G. E. 2009 Lab and field experiments: Are they the same animal?  
512 *Horm. Behav.* **56**, 1–10. (doi:10.1016/j.yhbeh.2009.02.010)
- 513 8. Vanin, S., Bhutani, S., Montelli, S., Menegazzi, P., Green, E. W., Pegoraro, M., Sandrelli,  
514 F., Costa, R. & Kyriacou, C. P. 2012 Unexpected features of *Drosophila* circadian  
515 behavioural rhythms under natural conditions. *Nature* **484**, 371–375.  
516 (doi:10.1038/nature10991)
- 517 9. Dominoni, D. M., Helm, B., Lehmann, M., Dowse, H. B. & Partecke, J. 2013 Clocks for  
518 the city: circadian differences between forest and city songbirds. *Proc. R. Soc. London B*  
519 *Biol. Sci.* **280**, 20130593. (doi:10.1098/rspb.2013.0593)
- 520 10. Steiger, S. S., Valcu, M., Spoelstra, K., Helm, B., Wikelski, M. & Kempenaers, B. 2013  
521 When the sun never sets: diverse activity rhythms under continuous daylight in free-living  
522 arctic-breeding birds. *Proc. R. Soc. B* **280**, 20131016. (doi:10.1098/rspb.2013.1016)
- 523 11. Bulla, M. et al. 2016 Unexpected diversity in socially synchronized rhythms of shorebirds.  
524 *Nature* **540**, 109–113.
- 525 12. Bulla, M., Valcu, M., Rutten, A. L. & Kempenaers, B. 2014 Biparental incubation patterns  
526 in a high-Arctic breeding shorebird: How do pairs divide their duties? *Behav. Ecol.* **25**,  
527 152–164. (doi:10.1093/beheco/art098)
- 528 13. Lesku, J. A., Rattenborg, N. C., Valcu, M., Vyssotski, a. L., Kuhn, S., Kuemmeth, F.,  
529 Heidrich, W. & Kempenaers, B. 2012 Adaptive Sleep Loss in Polygynous Pectoral  
530 Sandpipers. *Science (80-. )*. **337**, 1654–1658. (doi:10.1126/science.1220939)
- 531 14. Rattenborg, N. C., Voirin, B., Cruz, S. M., Tisdale, R., Dell’Omo, G., Lipp, H.-P.,  
532 Wikelski, M. & Vyssotski, A. L. 2016 Evidence that birds sleep in mid-flight. *Nat.*  
533 *Commun.* **7**, 12468. (doi:10.1038/ncomms12468)
- 534 15. Spoelstra, K., Wikelski, M., Daan, S., Loudon, A. S. I. & Hau, M. 2015 Natural selection  
535 against a circadian clock gene mutation in mice. *Proc. Natl. Acad. Sci. U. S. A.* ,  
536 201516442. (doi:10.1073/pnas.1516442113)
- 537 16. Daan, S. & Aschoff, J. 1975 Circadian rhythms of locomotor activity in captive birds and  
538 mammals: their variation with season and latitude. *Oecologia* **18**, 269–316.  
539 (doi:10.1007/BF00345851)
- 540 17. Plautz, J. D., Straume, M., Stanewsky, R., Jamison, C. F., Brandes, C., Dowse, H. B., Hall,  
541 J. C. & Kay, S. A. 1997 Quantitative Analysis of *Drosophila* period Gene Transcription in  
542 Living Animals. *J. Biol. Rhythms* **12**, 204–217. (doi:10.1177/074873049701200302)
- 543 18. Meijer, J. H. et al. 2014 Wheel running in the wild. *Proc. R. Soc. B* **281**, 348–357.

- 544 (doi:10.1098/rspb.2014.0210)
- 545 19. Williams, C. T., Barnes, B. M. & Buck, C. L. 2012 Daily body temperature rhythms persist  
546 under the midnight sun but are absent during hibernation in free-living arctic ground  
547 squirrels. *Biol. Lett.* **8**, 31–4. (doi:10.1098/rsbl.2011.0435)
- 548 20. Dominoni, D. M., Goymann, W., Helm, B. & Partecke, J. 2013 Urban-like night  
549 illumination reduces melatonin release in European blackbirds (*Turdus merula*):  
550 implications of city life for biological time-keeping of songbirds. *Front. Zool.* **10**, 60.  
551 (doi:10.1186/1742-9994-10-60)
- 552 21. Eckel-Mahan, K. L., Patel, V. R., Mohny, R. P., Vignola, K. S., Baldi, P. & Sassone-  
553 Corsi, P. 2012 Coordination of the transcriptome and metabolome by the circadian clock.  
554 *PNAS* **109**, 5541–5546. (doi:10.1073/pnas.1118726109)
- 555 22. Bäckman, J., Andersson, A., Alerstam, T., Pedersen, L., Sjöberg, S., Thorup, K. & Tøttrup,  
556 A. P. 2016 Activity and migratory flights of individual free-flying songbirds throughout the  
557 annual cycle: method and first case study. *J. Avian Biol.* **47**, 1–11. (doi:10.1111/jav.01068)
- 558 23. Liechti, F. et al. 2013 First evidence of a 200-day non-stop flight in a bird. *Nat. Commun.*  
559 **4**, R861–R870. (doi:10.1038/ncomms3554)
- 560 24. Rattenborg, N. C., Voirin, B., Vyssotski, A. L., Kays, R. W., Spoelstra, K., Kuemmeth, F.,  
561 Heidrich, W. & Wikelski, M. 2008 Sleeping outside the box: electroencephalographic  
562 measures of sleep in sloths inhabiting a rainforest. *Biol. Lett.* **4**, 402–405.  
563 (doi:10.1098/rsbl.2008.0203)
- 564 25. Wilson, R. P., Shepard, E. L. C. & Liebsch, N. 2008 Prying into the intimate details of  
565 animal lives: Use of a daily diary on animals. *Endanger. Species Res.* **4**, 123–137.  
566 (doi:10.3354/esr00064)
- 567 26. Davidson, A. J. & Menaker, M. 2003 Birds of a feather clock together – sometimes: social  
568 synchronization of circadian rhythms. *Curr. Opin. Neurobiol.* **13**, 765–769.  
569 (doi:10.1016/j.conb.2003.10.011)
- 570 27. Bulla, M. 2014 R-script and example to extract incubation from temperature measurements.  
571 (doi:https://dx.doi.org/10.6084/m9.figshare.1037545.v1)
- 572 28. Bulla, M. et al. 2016 Supporting Information for ‘Unexpected diversity in socially  
573 synchronized rhythms of shorebirds’. *Open Sci. Fram.*  
574 (doi:http://doi.org/10.17605/OSF.IO/WXUFM)
- 575 29. Rijnsdorp, A., Daan, S. & Dijkstra, C. 1981 Hunting in the kestrel, *Falco tinnunculus*, and  
576 the adaptive significance of daily habits. *Oecologia* **50**, 391–406.

- 577 (doi:10.1007/BF00344982)
- 578 30. Klaassen, R. H. G., Strandberg, R., Hake, M. & Alerstam, T. 2008 Flexibility in daily  
579 travel routines causes regional variation in bird migration speed. *Behav. Ecol. Sociobiol.*  
580 **62**, 1427–1432. (doi:10.1007/s00265-008-0572-x)
- 581 31. Willis, J., Phillips, J., Muheim, R., Diego-Rasilla, F. J. & Hobday, A. J. 2009 Spike dives  
582 of juvenile southern bluefin tuna (*Thunnus maccoyii*): a navigational role? *Behav. Ecol.*  
583 *Sociobiol.* **64**, 57–68. (doi:10.1007/s00265-009-0818-2)
- 584 32. Evans, T., Kadin, M., Olsson, O. & Åkesson, S. 2013 Foraging behaviour of common  
585 murrelets in the Baltic Sea, recorded by simultaneous attachment of GPS and time-depth  
586 recorder devices. *Mar. Ecol. - Prog. Ser.* **475**, 277–289.
- 587 33. Ensing, E. P. et al. 2014 GPS Based Daily Activity Patterns in European Red Deer and  
588 North American Elk (*Cervus elaphus*): Indication for a Weak Circadian Clock in  
589 Ungulates. *PLoS One* **9**, e106997. (doi:10.1371/journal.pone.0106997)
- 590 34. Bouten, W., Baaij, E. W., Shamoun-Baranes, J. & Camphuysen, K. C. J. 2012 A flexible  
591 GPS tracking system for studying bird behaviour at multiple scales. *J. Ornithol.* **154**, 571–  
592 580. (doi:http://dx.doi.org/10.1007/s10336-012-0908-1)
- 593 35. Trierweiler, C., Klaassen, R. H. G., Drent, R. H., Exo, K.-M., Komdeur, J., Bairlein, F. &  
594 Koks, B. J. 2014 Migratory connectivity and population-specific migration routes in a long-  
595 distance migratory bird. *Proc. R. Soc. B* **281**, 20132897. (doi:10.1098/rspb.2013.2897)
- 596 36. Horn, H. S. 1966 Measurement of ‘Overlap’ in Comparative Ecological Studies. *Am. Nat.*  
597 **100**, 419–424.
- 598 37. Koks, B. J., Trierweiler, C., Visser, E. G., Dijkstra, C. & Komdeur, J. 2007 Do voles make  
599 agricultural habitat attractive to Montagu’s Harrier *Circus pygargus*? *Ibis (Lond. 1859)*.  
600 **149**, 575–586. (doi:10.1111/j.1474-919X.2007.00683.x)
- 601 38. Schlaich, A. E., Klaassen, R. H. G., Bouten, W., Bretagnolle, V., Koks, B. J., Villers, A. &  
602 Both, C. 2016 How individual Montagu’s Harriers cope with Moreau’s Paradox during the  
603 Sahelian winter. *J. Anim. Ecol.* (doi:10.1111/1365-2656.12583)
- 604 39. Trierweiler, C., Mullié, W. C., Drent, R. H., Exo, K. M., Komdeur, J., Bairlein, F.,  
605 Harouna, A., De Bakker, M. & Koks, B. J. 2013 A Palaearctic migratory raptor species  
606 tracks shifting prey availability within its wintering range in the Sahel. *J. Anim. Ecol.* **82**,  
607 107–120. (doi:10.1111/j.1365-2656.2012.02036.x)
- 608 40. van Overveld, T. et al. 2010 Personality predicts spatial responses to food manipulations in  
609 free-ranging great tits (*Parus major*). *Biol. Lett.* **6**, 187–90. (doi:10.1098/rsbl.2009.0764)

- 610 41. Brown, S. A. et al. 2005 The Period Length of Fibroblast Circadian Gene Expression  
611 Varies Widely among Human Individuals. *PLoS Biol.* **3**, e338.  
612 (doi:10.1371/journal.pbio.0030338)
- 613 42. Nagoshi, E., Saini, C., Bauer, C., Laroche, T., Naef, F. & Schibler, U. 2004 Circadian gene  
614 expression in individual fibroblasts: cell-autonomous and self-sustained oscillators pass  
615 time to daughter cells. *Cell* **119**, 693–705. (doi:10.1016/j.cell.2004.11.015)
- 616 43. Krishnan, B., Levine, J. D., Lynch, M. K., Dowse, H. B., Funes, P., Hall, J. C., Hardin, P.  
617 E. & Dryer, S. E. 2001 A new role for cryptochrome in a *Drosophila* circadian oscillator.  
618 *Nature* **411**, 313–317. (doi:10.1038/35077094)
- 619 44. Pittendrigh, C. S. & Minis, D. H. 1972 Circadian systems: longevity as a function of  
620 circadian resonance in *Drosophila melanogaster*. *PNAS* **69**, 1537–1539.
- 621 45. Kays, R., Crofoot, M. C., Jetz, W. & Wikelski, M. 2015 ECOLOGY. Terrestrial animal  
622 tracking as an eye on life and planet. *Science (80-. )*. **348**, aaa2478.  
623 (doi:10.1126/science.aaa2478)
- 624 46. Kissling, W. D., Pattemore, D. E. & Hagen, M. 2014 Challenges and prospects in the  
625 telemetry of insects. *Biol. Rev.* **89**, 511–530. (doi:10.1111/brv.12065)
- 626 47. Wikelski, M., Moskowitz, D., Adelman, J. S., Cochran, J., Wilcove, D. S. & May, M. L.  
627 2006 Simple rules guide dragonfly migration. *Biol. Lett.* **2**, 325–329.
- 628 48. Schneider, C. W., Tautz, J., Grünewald, B. & Fuchs, S. 2012 RFID Tracking of Sublethal  
629 Effects of Two Neonicotinoid Insecticides on the Foraging Behavior of *Apis mellifera*.  
630 *PLoS One* **7**, e30023. (doi:10.1371/journal.pone.0030023)
- 631 49. Stefanescu, C. et al. 2013 Multi-generational long-distance migration of insects: Studying  
632 the painted lady butterfly in the Western Palaearctic. *Ecography (Cop.)*. **36**, 474–486.  
633 (doi:10.1111/j.1600-0587.2012.07738.x)
- 634 50. Hobbs, S. E., Wolf, W. W., Hobbs, S. E. & Wolf, W. W. 1996 Developments in Airborne  
635 Entomological Radar. *J. Atmos. Ocean. Technol.* **13**, 58–61. (doi:10.1175/1520-  
636 0426(1996)013<0058:DIAER>2.0.CO;2)
- 637 51. Leskinen, M., Markkula, I., Koistinen, J., Pylkkö, P., Ooperi, S., Siljamo, P., Ojanen, H.,  
638 Raiskio, S. & Tiilikkala, K. 2011 Pest insect immigration warning by an atmospheric  
639 dispersion model, weather radars and traps. *J. Appl. Entomol.* **135**, 55–67.  
640 (doi:10.1111/j.1439-0418.2009.01480.x)
- 641 52. Cant, E. T., Smith, A. D., Reynolds, D. R. & Osborne, J. L. 2005 Tracking butterfly flight  
642 paths across the landscape with harmonic radar. *Proc. R. Soc. B* **272**, 785–90.

- 643 (doi:10.1098/rspb.2004.3002)
- 644 53. Chapman, J. W., Nesbit, R. L., Burgin, L. E., Reynolds, D. R., Smith, A. D., Middleton, D.  
645 R. & Hill, J. K. 2010 Flight orientation behaviors promote optimal migration trajectories in  
646 high-flying insects. *Science (80-. )*. **327**, 682–685.
- 647 54. Åkesson, S. 2016 Flying with the winds: differential migration strategies in relation to  
648 winds in moth and songbirds. *J. Anim. Ecol.* **85**, 1–4. (doi:10.1111/1365-2656.12450)
- 649 55. Brydegaard, M., Guan, Z., Wellenreuther, M. & Svanberg, S. 2009 Insect monitoring with  
650 fluorescence lidar techniques: feasibility study. *Appl. Opt.* **48**, 5668.  
651 (doi:10.1364/AO.48.005668)
- 652 56. Brydegaard, M., Gebru, A. & Svanberg, S. 2014 Super Resolution Laser Radar with  
653 Blinking Atmospheric Particles---Application to Interacting Flying Insects. *Prog.*  
654 *Electromagn. Res.* **147**, 141–151. (doi:10.2528/PIER14101001)
- 655 57. Guan, Z., Brydegaard, M., Lundin, P., Wellenreuther, M., Runemark, A., Svensson, E. I. &  
656 Svanberg, S. 2010 Insect monitoring with fluorescence lidar techniques: field experiments.  
657 *Appl. Opt.* **49**, 5133. (doi:10.1364/AO.49.005133)
- 658 58. Runemark, A., Wellenreuther, M., Jayaweera, H. H. E., Svanberg, S. & Brydegaard, M.  
659 2012 Rare Events in Remote Dark-Field Spectroscopy: An Ecological Case Study of  
660 Insects. *IEEE J. Sel. Top. Quantum Electron.* **18**, 1573–1582.  
661 (doi:10.1109/JSTQE.2012.2184528)
- 662 59. Kirkeby, C., Wellenreuther, M. & Brydegaard, M. 2016 Observations of movement  
663 dynamics of flying insects using high resolution lidar. *Sci. Rep.* **6**, 29083.  
664 (doi:10.1038/srep29083)
- 665 60. Brydegaard, M., Gebru, A., Kirkeby, C., Åkesson, S. & Smith, H. G. 2015 Daily evolution  
666 of the insect biomass spectrum in an agricultural landscape accessed with lidar. In *Proc.*  
667 *27th Intern Laser Radar Conference, USA*, pp. 4.
- 668 61. Lundin, P., Samuelsson, P., Svanberg, S., Runemark, A., Åkesson, S. & Brydegaard, M.  
669 2011 Remote nocturnal bird classification by spectroscopy in extended wavelength ranges.  
670 *Appl. Opt.* **50**, 3396. (doi:10.1364/AO.50.003396)
- 671 62. Daan, S. 1981 Adaptive daily strategies in behavior. In *Handbook of Behavioral*  
672 *Neurobiology; Biological Rhythms* (ed J. Aschoff), pp. 275–298. New York: Plenum Press.
- 673 63. Pittendrigh, C. S. 1993 Temporal organization: reflections of a Darwinian clock-watcher.  
674 *Annu. Rev. Physiol.* **55**, 17–54.
- 675 64. Saunders, D. S. 1972 Circadian control of larval growth rate in *Sarcophaga argyrostoma*.

- 676 *Proc. Natl. Acad. Sci.* **69**, 2738–2740.
- 677 65. Libert, S., Bonkowski, M. S., Pointer, K., Pletcher, S. D. & Guarente, L. 2012 Deviation of  
678 innate circadian period from 24 h reduces longevity in mice. *Aging Cell* **11**, 794–800.  
679 (doi:10.1111/j.1474-9726.2012.00846.x)
- 680 66. Hurd, M. W. & Ralph, M. R. 1998 The Significance of Circadian Organization for  
681 Longevity in the Golden Hamster. *J. Biol. Rhythms* **13**, 430–436.  
682 (doi:10.1177/074873098129000255)
- 683 67. Johnson, C. H. 2005 Testing the adaptive value of circadian systems. *Methods Enzymol.*  
684 **393**, 818–837.
- 685 68. DeCoursey, P. J. 2004 Diversity of Function of SCN Pacemakers in Behavior and Ecology  
686 of Three Species of Sciurid Rodents. *Biol. Rhythm Res.* **35**, 13–33.  
687 (doi:10.1080/09291010412331313214)
- 688 69. DeCoursey, P. J., Krulas, J. R., Mele, G. & Holley, D. C. 1997 Circadian performance of  
689 suprachiasmatic nuclei (SCN)-lesioned antelope ground squirrels in a desert enclosure.  
690 *Physiol. Behav.* **62**, 1099–1108.
- 691 70. DeCoursey, P. J., Walker, J. K. & Smith, S. A. 2000 A circadian pacemaker in free-living  
692 chipmunks: essential for survival? *J. Comp. Physiol. A* **186**, 169–180.
- 693 71. Stephan, F. K. & Zucker, I. 1972 Circadian Rhythms in Drinking Behavior and Locomotor  
694 Activity of Rats Are Eliminated by Hypothalamic Lesions. *PNAS* **69**, 1583–1586.
- 695 72. Ibuka, N. & Kawamura, H. 1975 Loss of circadian rhythm in sleep-wakefulness cycle in  
696 the rat by suprachiasmatic nucleus lesions. *Brain Res.* **96**, 76–81. (doi:10.1016/0006-  
697 8993(75)90574-0)
- 698 73. Ouyang, Y., Andersson, C. R., Kondo, T., Golden, S. S. & Johnson, C. H. 1998 Resonating  
699 circadian clocks enhance fitness in cyanobacteria. *Proc. Natl. Acad. Sci.* **95**, 8660–8664.
- 700 74. Woelfle, M. A., Ouyang, Y., Phanvijhitsiri, K. & Johnson, C. H. 2004 The Adaptive Value  
701 of Circadian Clocks. *Curr. Biol.* **14**, 1481–1486. (doi:10.1016/j.cub.2004.08.023)
- 702 75. Daan, S. et al. 2011 Lab Mice in the Field: Unorthodox Daily Activity and Effects of a  
703 Dysfunctional Circadian Clock Allele. *J. Biol. Rhythms* **26**, 118–129.  
704 (doi:10.1177/0748730410397645)
- 705 76. Albrecht, U., Bordon, A., Schmutz, I. & Ripperger, J. 2007 The multiple facets of Per2. In  
706 *Cold Spring Harbor symposia on quantitative biology*, pp. 95–104. Cold Spring Harbor  
707 Laboratory Press.
- 708 77. Loudon, A. S. I., Meng, Q. J., Maywood, E. S., Bechtold, D. A., Boot-Handford, R. P. &

- 709 Hastings, M. H. 2007 The Biology of the Circadian Ck1 $\epsilon$  tau Mutation in Mice and Syrian  
710 Hamsters: A Tale of Two Species. *Cold Spring Harb. Symp. Quant. Biol.* **72**, 261–271.  
711 (doi:10.1101/sqb.2007.72.073)
- 712 78. Brown, S. A. et al. 2005 The period length of fibroblast circadian gene expression varies  
713 widely among human individuals. *PLoS Biol.* **3**, e338.
- 714 79. De Jong, M., Ouyang, J. Q., Silva, A. Da, Grunsvan, R. H. A. Van, Kempnaers, B.,  
715 Visser, M. E. & Spoelstra, K. 2015 Effects of nocturnal illumination on life-history  
716 decisions and fitness in two wild songbird species. *Phil Trans R Soc B* **370**, 1–8.  
717 (doi:10.1098/rstb.2014.0128)
- 718 80. Dominoni, D. M., Borniger, J. C. & Nelson, R. J. 2016 Light at night, clocks and health:  
719 from humans to wild organisms. *Biol. Lett.* **12**, 20160015. (doi:10.1098/rsbl.2016.0015)
- 720 81. Dominoni, D. M. 2015 The effects of light pollution on biological rhythms of birds: an  
721 integrated, mechanistic perspective. *J. Ornithol.* **156**, 409. (doi:10.1007/s10336-015-1196-  
722 3)
- 723 82. Swaddle, J. P. et al. 2015 A framework to assess evolutionary responses to anthropogenic  
724 light and sound. *Trends Ecol. Evol.* **30**, 550–560. (doi:10.1016/j.tree.2015.06.009)
- 725 83. Kempnaers, B., Borgström, P., Loës, P., Schlicht, E. & Valcu, M. 2010 Artificial night  
726 lighting affects dawn song, extra-pair siring success, and lay date in songbirds. *Curr. Biol.*  
727 **20**, 1735–1739. (doi:10.1016/j.cub.2010.08.028)
- 728 84. Dominoni, D. M. & Partecke, J. 2015 Does light pollution alter daylength? A test using  
729 light loggers on free-ranging European blackbirds (*Turdus merula*). *Phil Trans R Soc B*  
730 **370**, 20140118. (doi:10.1098/rstb.2014.0118)
- 731 85. Payne, N. L. et al. 2013 Rain reverses diel activity rhythms in an estuarine teleost. *Proc.*  
732 *Biol. Sci.* **280**, 20122363. (doi:10.1098/rspb.2012.2363)
- 733 86. Tomotani, B. M. et al. 2012 Field and laboratory studies provide insights into the meaning  
734 of day-time activity in a subterranean rodent (*Ctenomys aff. knighti*), the Tuco-Tuco. *PLoS*  
735 *One* **7**, e37918. (doi:10.1371/journal.pone.0037918)
- 736 87. Rowcliffe, J. M., Kays, R., Kranstauber, B., Carbone, C. & Jansen, P. A. 2014 Quantifying  
737 levels of animal activity using camera trap data. *Methods Ecol. Evol.* **5**, 1170–1179.  
738 (doi:10.1111/2041-210X.12278)
- 739 88. Hope, P. R. & Jones, G. 2013 An entrained circadian cycle of peak activity in a population  
740 of hibernating bats. *J. Mammal.* **94**, 497–505. (doi:10.1644/12-MAMM-A-095.1)
- 741 89. Bishop, C. M. et al. 2015 The roller coaster flight strategy of bar-headed geese conserves

- 742 energy during Himalayan migrations. *Science* **347**, 250–4. (doi:10.1126/science.1258732)
- 743 90. Decoursey, P. J., Pius, S., Sandlin, C., Wethey, D. & Schull, J. 1998 Relationship of  
744 Circadian Temperature and Activity Rhythms in Two Rodent Species. *Physiol. Behav.* **65**,  
745 457–463. (doi:10.1016/S0031-9384(98)00187-5)
- 746 91. Dallmann, R., Viola, A. U., Tarokh, L., Cajochen, C. & Brown, S. A. 2012 The human  
747 circadian metabolome. *PNAS* **109**, 2625–2629. (doi:10.1073/pnas.1114410109)

748

749

750

751

752

753

754

755

756 **Tables**

757

758 **Table 1.** Examples of pressing questions in the field chronobiology.

| # | Question                                                                                                                                       | Case study |
|---|------------------------------------------------------------------------------------------------------------------------------------------------|------------|
| 1 | How variable are rhythms within and between taxa, species, populations and individuals?                                                        | 1, 2       |
| 2 | What drives such variation? (e.g. environmental conditions, internal state, sociality, anthropogenic disturbance, global environmental change) | 1, 2       |
| 3 | Are rhythms of captive animals comparable to rhythms of animals in the wild?                                                                   | 1          |
| 4 | How can we disentangle the relative contribution of endogenous (genes) versus exogenous (environment) drivers of rhythmicity in wild species?  |            |
| 5 | Is variation in rhythms associated to fitness?                                                                                                 | 3          |

759

760

761



762  
763  
764  
765

**Table 2. Methods to record behavioural and physiological rhythms in free-living animals.** Methods ordered according to (1) type, (2) level of application, (3) tag weight and (4) price. Specific applications are listed only when unique to the given method. For instance, for behavioural rhythms all methods are applicable to record activity vs. non-activity and hence that is not stated.

| TYPE                          | LEVEL                             | COST                                           | WEIGHT   | METHOD                                                 | DESCRIPTION                                                                                                                                                                                          | APPLICATION                                                                                 | +/-                                                                            | SOURCE  |
|-------------------------------|-----------------------------------|------------------------------------------------|----------|--------------------------------------------------------|------------------------------------------------------------------------------------------------------------------------------------------------------------------------------------------------------|---------------------------------------------------------------------------------------------|--------------------------------------------------------------------------------|---------|
| <b>Behavioural rhythms</b>    |                                   |                                                |          |                                                        |                                                                                                                                                                                                      |                                                                                             |                                                                                |         |
| On board (recapture required) | Individual                        | €50-200 / tag                                  | > 2g     | Light loggers (including light-based geolocators)      | Record ambient light levels over time, serve as a proxy for activity. Sometimes also humidity, salinity, acceleration.                                                                               | Cave nesting and roosting animals, or incubation in birds.                                  | - inaccurate proxy of position<br>- light intensity might not reflect activity | [11,84] |
| On board (recapture required) | Individual                        | €50-200 / tag                                  | > 0.7g   | Accelerometers                                         | Measure bi- or tri-axial acceleration                                                                                                                                                                | Identification of specific behaviours and measurement of energy consumption                 | + insight into daily organisation of behaviours                                | [22,23] |
| On board                      | Individual                        | < €5000/ tag                                   | > 2g     | GPS tracking devices                                   | Position estimated in relation to stationary satellites is stored on board and/or send via satellite, cellular, or radio modem in a real time or when animals approach a receiving station.          | Information on position in space (e.g. nest, roost, foraging site attendance, habitat type) | + great proxy of position in space<br>-costly                                  | [33,38] |
| Stationary                    | Individual                        | €7/ tag<br>€400-1000 / energy-efficient reader | > 1 mg   | Radio Frequency Identification (RFID)                  | Electromagnetic fields detects individuals (1cm – 5 cm away) tagged with passive transponders. Reader requires constant energy supply.                                                               | Rhythmicity of visits to specific resources (feeding stations) or locations (nests)         | + cheap<br>- relies on periodic visits from animals                            | [11,15] |
| Stationary                    | Individual                        | >€50k / station                                | > 6 mg   | Harmonic radar with passive tags                       | Tags (up to 1km afar) transpose an incoming radar signal to a different frequency. When received by the radar station, such reflected signal is distinguishable from other radar-reflective objects. | Record local activity                                                                       | + detailed activity and spatial information                                    | [46]    |
| Stationary                    | Individual                        | €3000 / receiver                               | > 0.25 g | Automated radio, acoustic or electro-magnetic tracking | Transmitters emit signal that is captured by automated receivers up to several kilometres afar.                                                                                                      | Position in space, activity rhythms and interactions of individuals                         | + continuous monitoring of activity state<br>-no info on behavior              | [9,85]  |
| Stationary                    | Individual<br>Group<br>Population | Labour                                         | > 0.25 g | Continuous observations                                | Periodic observation of animal behaviour via sight, video-recordings, or radio-tag signal                                                                                                            | Recording of daily organisation of specific behaviours                                      | + real insight into animal behaviour<br>- labour intensive                     | [86]    |

|            |                                     |                                      |  |                         |                                                                                                                       |                                                                                                                               |                                                                                      |      |
|------------|-------------------------------------|--------------------------------------|--|-------------------------|-----------------------------------------------------------------------------------------------------------------------|-------------------------------------------------------------------------------------------------------------------------------|--------------------------------------------------------------------------------------|------|
| Stationary | (Individual)<br>Group<br>Population | €50-200 / trap                       |  | Camera traps            | Daylight or infra-red illuminated short video or stills triggered by various sensor types (commonly infrared)         | Record rhythms of organisms confined to specific place (nest, boroughs), as well as spatial and temporal species interactions | + easy to deploy<br>- individuals commonly not identifiable<br>- many traps needed   | [87] |
| Stationary | Group<br>Population                 | €500-2000 / detector                 |  | Automatic bat detectors | Sound pressure triggered recording of echolocation                                                                    | Rhythms of free-ranging bats at a specific location                                                                           | - species and individual hard to identify<br>+ no interference with animal behaviour | [88] |
| Stationary | Group<br>Population                 | >€100k / station                     |  | Dark-field spectroscopy | Identifies organisms (e.g. flying insects) by registering sunlight reflected from their surface                       | Activity rhythms of groups of animals (if classification is validated)                                                        |                                                                                      | [58] |
| Stationary | Group<br>Population                 | >€300k / radar station               |  | Laser radar (lidar)     | Records spectrum of reflected laser light, can be combined with marking of the individuals (species) with colour dyes | Activity rhythms of groups of animals (if classification is validated)                                                        | + no interference with animal behaviour                                              | [59] |
| Stationary | Groups<br>Population                | €2M / radar (based on NexRad WSR88D) |  | Weather radars          | Record frequency changes in reflected radar signal (doppler-shift)                                                    | Temporal distribution and direction of passing birds, bats or insects.                                                        | + no interference with animal behaviour<br>- lack species recognition<br>- price     | [51] |

### Physiological rhythms

|                               |            |                                  |        |                                     |                                                                                                                    |                                                               |                                                                                          |         |
|-------------------------------|------------|----------------------------------|--------|-------------------------------------|--------------------------------------------------------------------------------------------------------------------|---------------------------------------------------------------|------------------------------------------------------------------------------------------|---------|
| On board                      | Individual | > €500 / tag                     | > 1 g  | Heart rate transmitters and loggers | Electromyocardiograms (EMG) are recorded from radio signals (transmitter) or electrodes (logger)                   | Rhythms of heart rate and energy consumption (metabolic rate) | + estimates of metabolic rate<br>- calibration for new studied species                   | [89]    |
| On board (recapture required) | Individual | > €1000 / tag                    | > 5 g  | EEG recorders                       | Measure voltage fluctuations resulting from ionic current within brain neurons                                     | Sleep rhythms                                                 | + real sleep patterns<br>- invasive                                                      | [13,14] |
| On board (recapture required) | Individual | > €50 / logger                   | > 1g   | Temperature loggers                 | Pulse rate of the radio-transmitter varies with temperature and is recorded by researcher or by automated receiver | Body temperature rhythms, health state (fever)                | - receiver close to the animal                                                           | [19]    |
| Stationary                    | Individual | < €300 / tag<br>€3000 / receiver | > 0.5g | Temperature radiotransmitters       | Record temperature based on variation in transmitter's pulse rate over time                                        | Body temperature rhythms, health state (fever)                | + records activity and body temperature simultaneously<br>- receiver close to the animal | [90]    |

767  
768**Table 3. Methods to record molecular rhythms in free-living animals. Table**

| METHOD                      | DESCRIPTION                                                                                                                                                                                             | APPLICATION                                                                                                                       | COST                                                            | +                                                                                                                                                | -                                                                               | SOURCE |
|-----------------------------|---------------------------------------------------------------------------------------------------------------------------------------------------------------------------------------------------------|-----------------------------------------------------------------------------------------------------------------------------------|-----------------------------------------------------------------|--------------------------------------------------------------------------------------------------------------------------------------------------|---------------------------------------------------------------------------------|--------|
| Fibroblast cells            | A clock gene probe flagged with a bioluminescent marker is inserted into fibroblasts cultured from skin biopsy. Rhythmic expression of clock gene is then measured in constant darkness in a lumicycle. | Measure circadian period length in fibroblast (dermal) cells                                                                      | > €100 per sample (after first investment to set up facilities) | - Insight into endogenous circadian traits<br>- Useful to disentangle endogenous (clock-driven) from environmental factors affecting rhythmicity | - Cell cultures facilities needed<br>- Requires the use of a lumicycle (> €50k) | [41]   |
| Gene expression             | Gene expression level is quantified via transcriptomics, microarrays, RT-qPCR                                                                                                                           | Diel and seasonal expression levels of candidate genes as well as of entire gene pathways (e.g. immunity, antioxidant system etc) | > €200 / sample                                                 | - Expression levels of candidate genes involved in timing, also thousands of genes simultaneously (transcriptomics)                              | - Bioinformatics<br>- Reference genome                                          | [21]   |
| Proteomics/<br>Metabolomics | Relative abundance of proteins and metabolites is quantified via mass-spectrometry                                                                                                                      | Diel and seasonal abundance of proteins and metabolites (including hormones)                                                      | > €200 / sample                                                 | - Allow studying the abundance of hundreds of proteins and metabolites simultaneously                                                            | - Bioinformatics                                                                | [91]   |
| Genetic engineering         | e.g. mutagenesis, gene targeting by homologous recombination, gene replacement                                                                                                                          | Daily and seasonal rhythms in sleep, activity, physiology in mutant animals lacking key circadian genes                           | €5000-10000 (for mice, less predictable for other animals)      | - Test properties and consequences of specific aspects of timing                                                                                 | - Pleiotropic effects may affect other genes than target circadian ones         | [15]   |

769

770

771

772

773

774

775

776

777 **Table 4. Methods used to derive incubation in biparental shorebirds**

| Method*                                      | How was incubation derived?                                                                                                                                                                                                                                                                                                                                                                                                                                                  | Sampling interval<br>(min) | N<br>populations | N<br>nests |
|----------------------------------------------|------------------------------------------------------------------------------------------------------------------------------------------------------------------------------------------------------------------------------------------------------------------------------------------------------------------------------------------------------------------------------------------------------------------------------------------------------------------------------|----------------------------|------------------|------------|
| RFID with temperature probe between the eggs | A thin antenna loop, placed around the nest cup and connected to the reader, registered presence of tagged parents at the nest; the passive-integrated tag was either embedded in a plastic flag [12] with which the parents were banded, or glued to the tail feathers [42]. Temperature recordings allowed to identify whether a bird was incubating even in the absence of RFID readings; an abrupt change in temperature demarcated the start or end of incubation [12]. | 0.08-5.5                   | 23               | 200        |
| light logger attached to bird's leg          | The logger recorded maximum light intensity for a fixed sampling interval (2-10 min) and recorded darkness when parent was incubating. An abrupt change in light intensity (as opposed to a gradual change caused, e.g. by civil twilight) followed by a period of low or high light intensity demarcated the start or end of the incubation period [11].                                                                                                                    | 2-10                       | 71               | 396        |
| GPS tag mounted on the back of the bird      | The tag recorded the position of the bird [43] and incubation was assumed whenever the bird was within 25 m of the nest.                                                                                                                                                                                                                                                                                                                                                     | 10-30                      | 2                | 9          |
| Automated receivers                          | Receivers recorded signal strength of a radio-tag attached to the rump of a bird; whenever a bird incubated, the strength of the signal remained constant [10].                                                                                                                                                                                                                                                                                                              | 0.07                       | 2                | 3          |
| Video cameras and continuous observations    | Videos and observations were used to identify the incubating parents; parent identification was based on plumage, colour rings or radio-tag.                                                                                                                                                                                                                                                                                                                                 | constant - 30              | 6                | 61         |

\* For technical specifications of the methods see Extended Data Table 1 in [11].

778

779

780

781

782

783

784

785

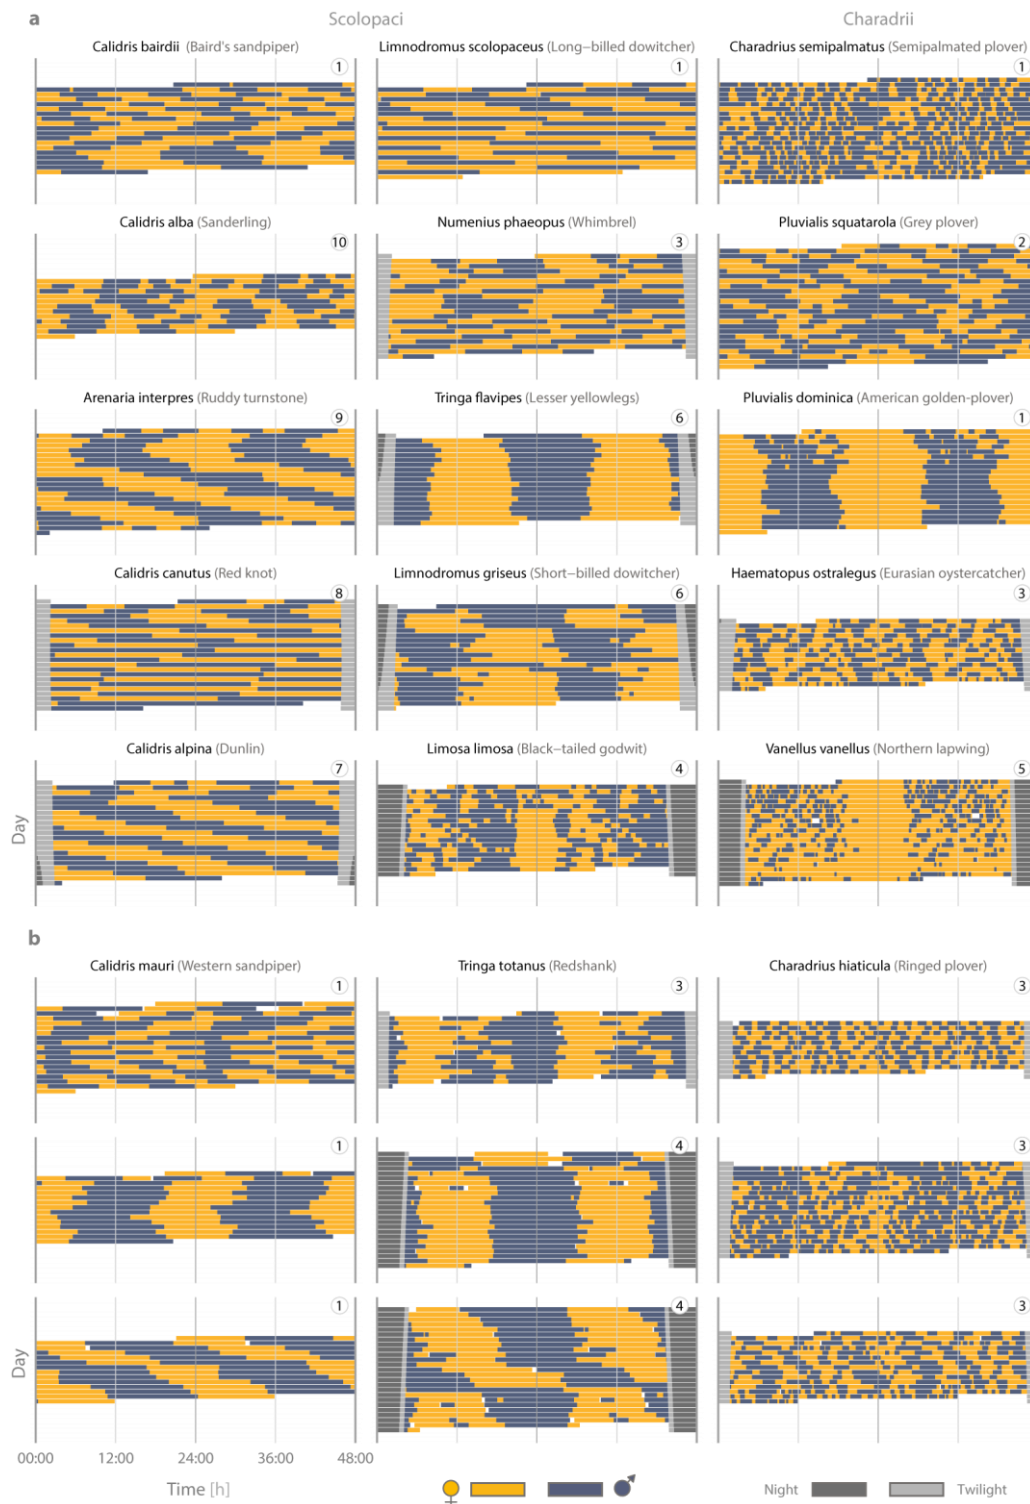

786

787

788

789

790

791

792

**Figure 1. Actograms illustrating the diversity of shorebird incubation rhythms. a-b,** Each actogram depicts the bouts of female (yellow; ♀) and male (blue-grey; ♂) incubation at a single nest over a 24-h period, plotted twice, such that each row represents two consecutive days. If present, twilight is indicated by light grey bars (▨) and corresponds to the time when the sun is between 6° and 0° below the horizon, night is indicated by dark grey bars (▩) and corresponds to the time when the sun is > 6° below the horizon. Twilight and night are omitted in the centre of

793 the actogram (24:00) to make the incubation rhythm visible. The circled numbers (1 2 3 ...) indicate  
794 the breeding site of each pair (i.e. highlight which pairs bred in the same breeding site). **a**,  
795 Between-species diversity. **b**, Within-species diversity. Note that the three rhythms for Western  
796 sandpiper and Ringed plover come from the same breeding location. The actograms for each nest  
797 in the study together with the data and code to replicate the figure are freely available at  
798 <https://osf.io/wxufm/> [28]. This figure was adopted from [11].

799  
800  
801  
802  
803

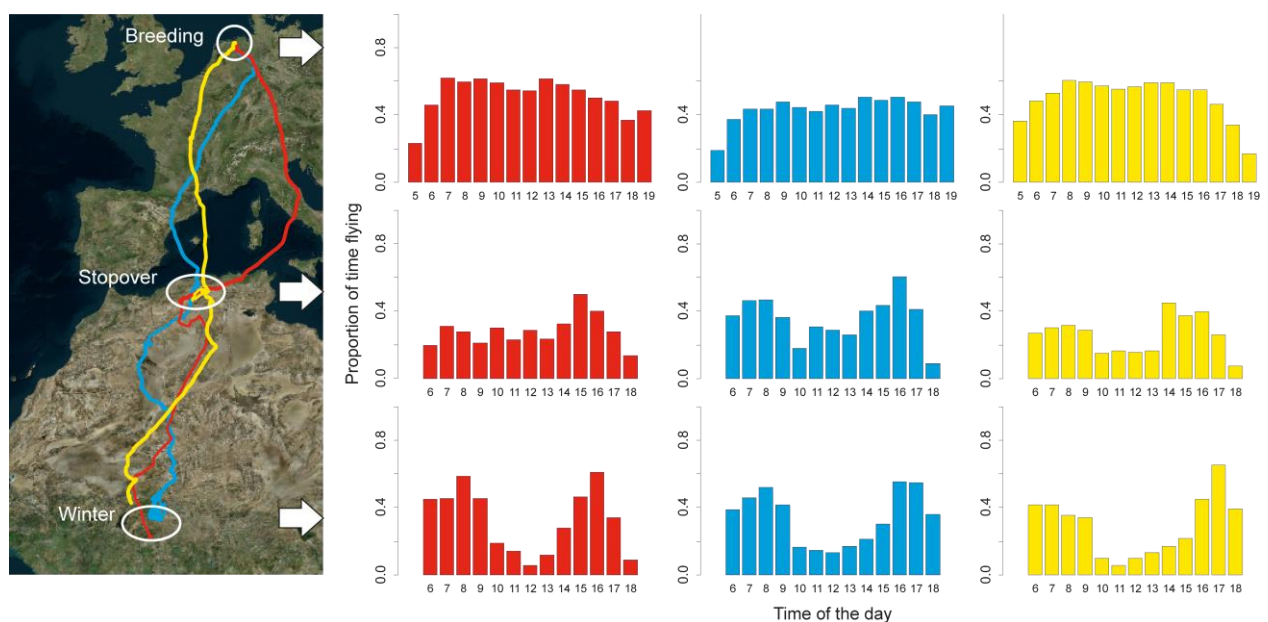

804  
805  
806  
807  
808  
809  
810  
811  
812

**Figure 2. Example of daily foraging rhythms in three Montagu's Harriers.** Map presents migration tracks and corresponding bar plots represent proportion of time a bird spent flying during each hour of the day (GMT; averaged across 7-14 days) at the wintering site (lower plots), main spring migratory stopover site (middle), and breeding site (upper). Note that only daylight hours are included as Montagu's Harriers are strictly diurnal and loggers recorded the necessary detailed information (5-30 min sampling interval) only during the day. The three harriers are distinguished by colour and name.

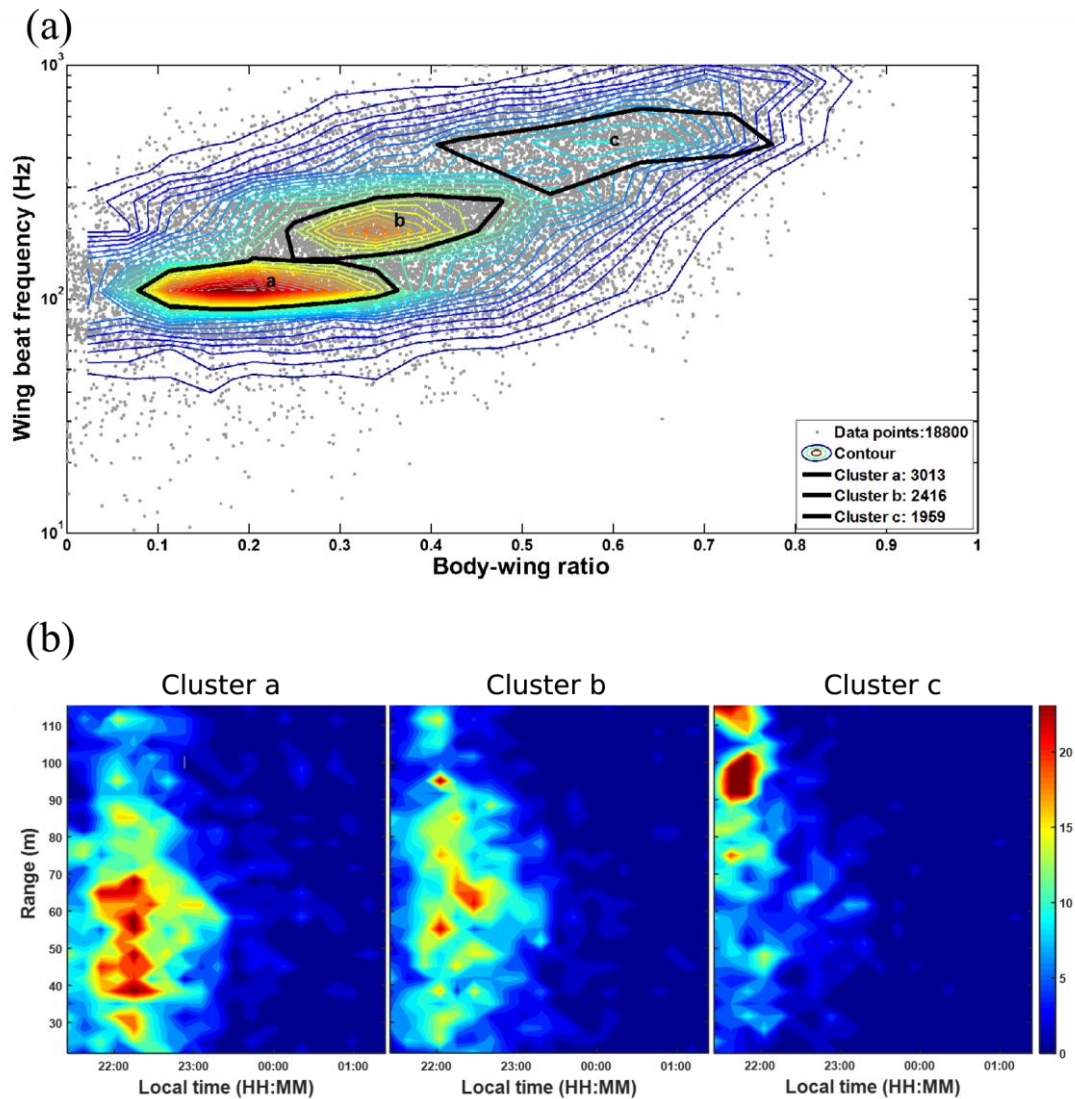

813

814 **Figure 3. Using lidar to classify insect groups and their temporal and spatial distribution.** (a)

815 Contour plot illustrates insect densities based on body-wing ratio and the wing beat frequency as  
816 recorded by lidar. The three major insect clusters are indicated by black curves and as verified by

817 insect traps represent mostly *Trichoptera* and *Chironomidae* (Cluster a), swarming non-biting

818 midges and flies (Cluster b), and compact insects (Cluster c). The number assigned to each cluster

819 in the legend represents the number of points in that cluster [59]. (b) Heat maps with temporal and

820 spatial distribution of the three insect clusters. Note that the 140m long transect (range) started in

821 an open meadow and terminated in a meadow surrounded by a forest edge. (a-b) Red denotes

822 areas with a high density of insects, whereas blue denotes low insect densities. Image reproduced

823 with permission from [59].

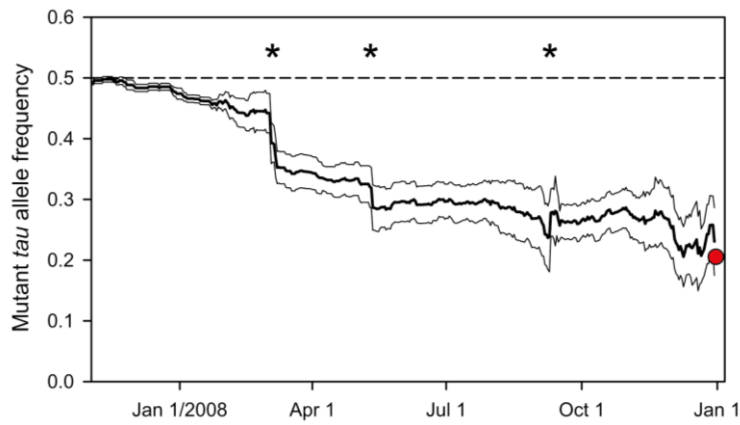

824

825 **Figure 4. The change of mutant *tau* allele frequency over time.** Thick line denotes the mean  
826 allele frequency, thin lines its standard errors, dashed line the 50% frequency of mutant allele.  
827 Asterisks indicate times at which the offspring of the existing mice were trapped and thus  
828 included in the censored population. The red dot indicates the final allele frequency after trapping  
829 of all mice at the end of the experiment. At the start, the mutant allele was in near Mendelian ratio  
830 (homozygote : heterozygote : wild type = 0.88 : 2.00 : 0.78, which resulted in a mutant allele  
831 frequency of 49.1%). After a little over a year, the allele frequency had dropped to 20.5%. Figure  
832 modified from [15].
